# Supplementary material for: Tubular immaturity causes erythropoietin-deficiency anemia of prematurity in preterm neonates
Source: PubMed Central journal article supplement (PMC5849759; doi:10.1038/s41598-018-22791-y), 2018-03-13
Supplement: 41598_2018_22791_MOESM1_ESM.pdf [file 41598_2018_22791_MOESM1_ESM.pdf]

**Tubular immaturity causes erythropoietin-deficiency anemia of prematurity in preterm neonates**

Nariaki Asada, MD<sup>1,2\*</sup>

**Affiliations:** 1. Department of Pediatrics, Keio University School of Medicine, Tokyo, Japan; 2.

Department of Pediatrics, SUBARU health insurance society Ota Memorial Hospital, Gunma, Japan

**\*Corresponding author:** Nariaki Asada, Department of Pediatrics, Keio University School of Medicine,

35 Shinanomachi, Shinjuku-ku, Tokyo, 160-8582, Japan, phone: +81-3-3353-1211, FAX:

+81-3-5379-1978; [[secretgardenrei@gmail.com](mailto:secretgardenrei@gmail.com)]

### Supplementary figure 1

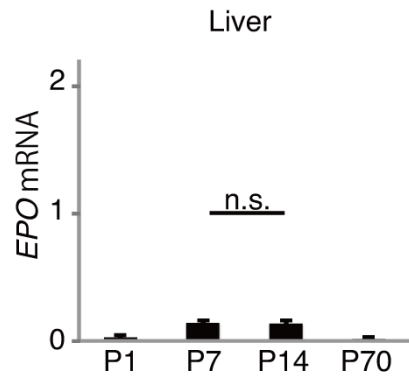

*EPO* mRNA in the liver increased to the same levels at P7 and P14 in response to the same degree of anemia ( $n = 4$ ). Error bars indicate SEM. n.s., not significant by Tukey-Kramer test.

## Supplementary figure 2

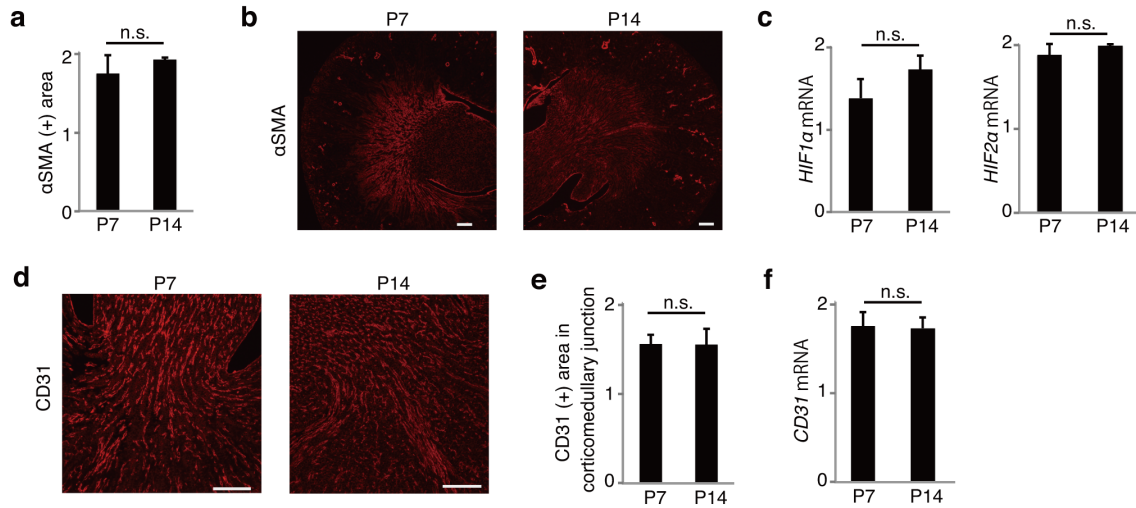

(a and b) The expression of myofibroblast marker, alpha-smooth muscle actin ( $\alpha$ SMA), was observed not only in the vessels but in interstitium both at P7 and P14 ( $n = 4$ ). (c) The mRNA expression of *HIF1 $\alpha$*  and *HIF2 $\alpha$*  in the kidney was comparable between P7 and 14 ( $n = 4$ ). (d-f) Capillary density, evaluated by CD31-positive area (d and e) or by the expression of *CD31* mRNA (f) was comparable between P7 and P14 ( $n = 4$ ). Error bars indicate SEM. n.s., not significant by t-test. Scale bars denote 100 micrometer.

### Supplementary figure 3

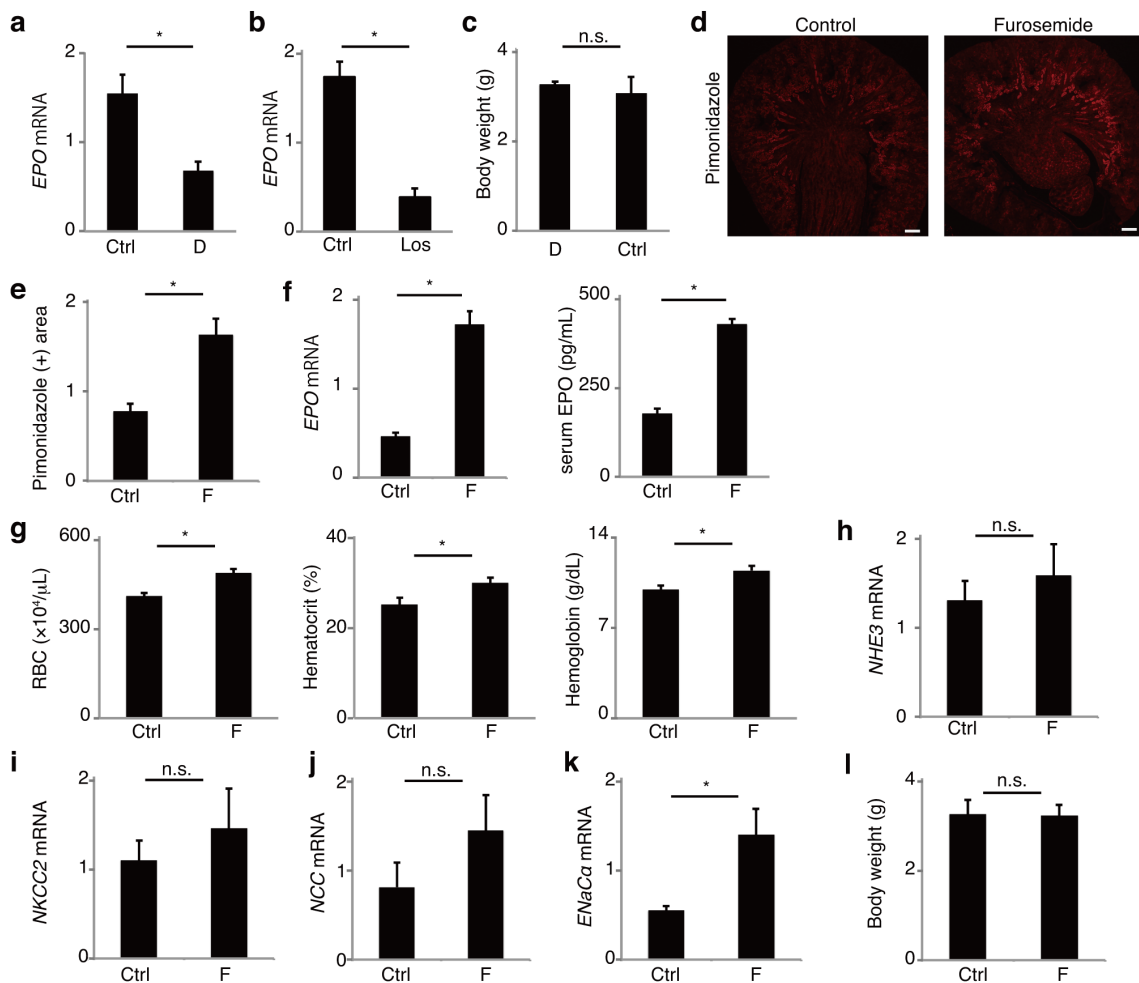

(a and b) In adult mice, renal *EPO* expression was reduced by short-term use of diuretics (a) or losartan (b) ( $n = 4$ ). (c) In long-term use of diuretics in neonatal mice from P3 to P7, body weight was comparable between the diuretics group and control ( $n = 4$ ). (d-l) Long-term use of furosemide ameliorated anemia of prematurity. The use of furosemide increased pimonidazole-positive hypoxic area (d and e), *EPO* levels (f), and parameters of anemia (g) ( $n = 4$ ). Among sodium transporters examined, only *ENaCa* expression was significantly elevated in furosemide group (h-k) ( $n = 4$ ). Body weight was comparable between the two groups (l). Error bars indicate SEM. \* $P < 0.05$  by t-test. n.s., not significant. Scale bars denote 100 micrometer. Ctrl, control; D, diuretics; Los, losartan; F, furosemide; RBC, red blood cells.

## Supplementary figure 4

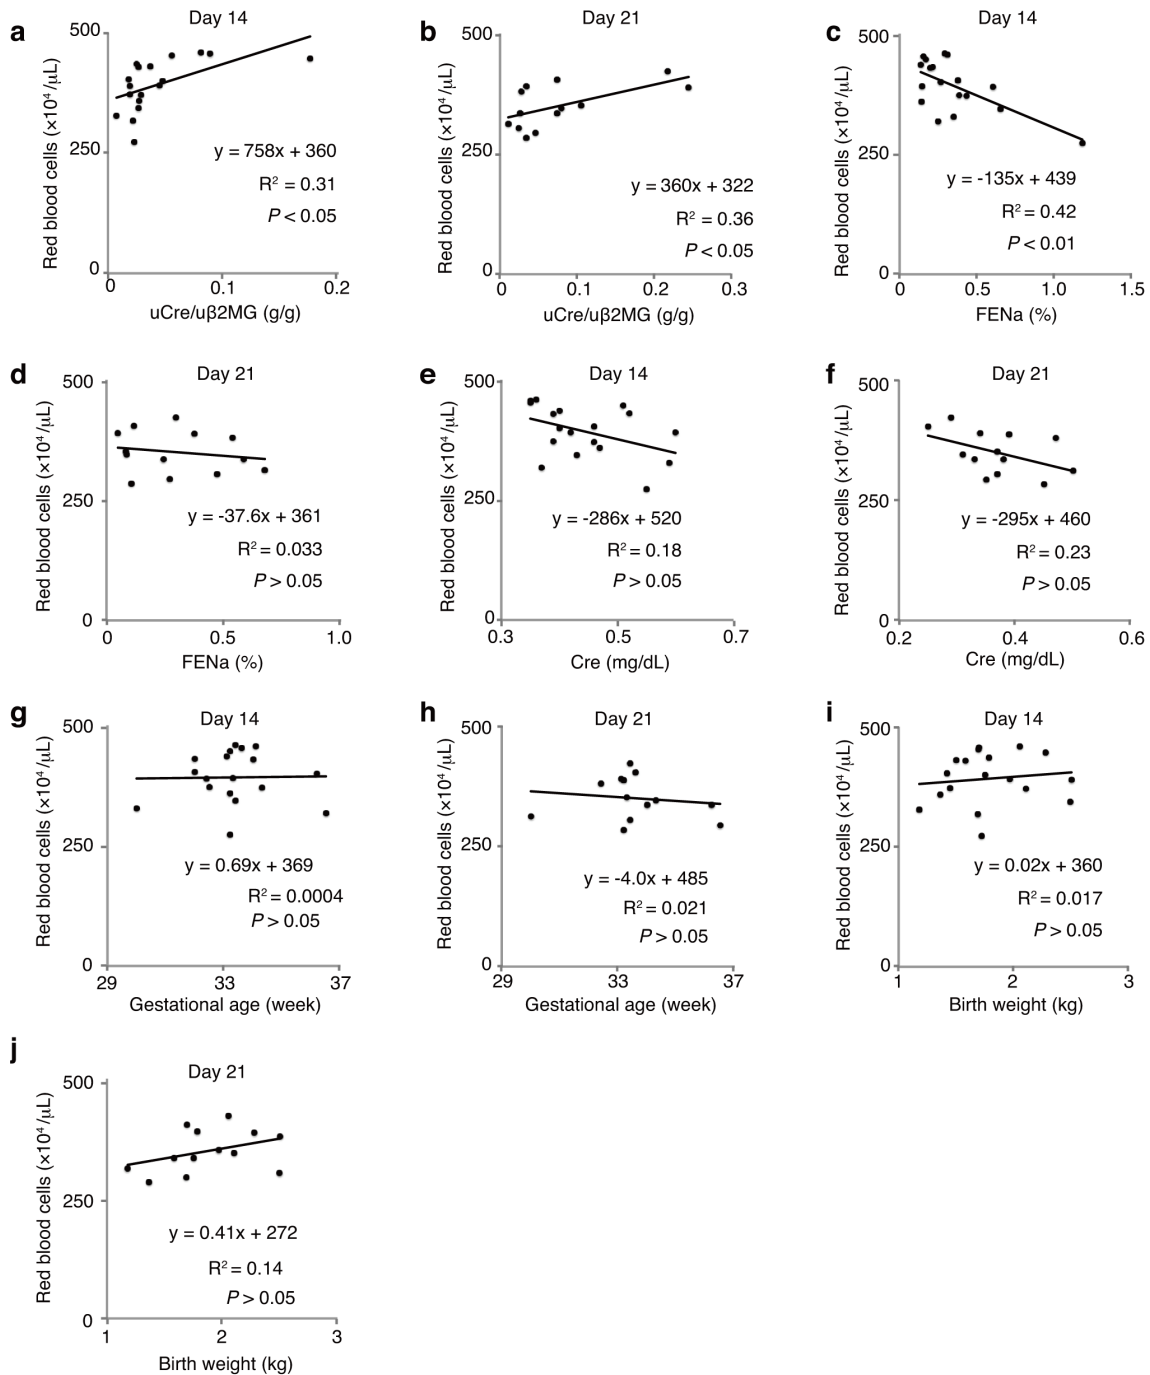

Tubular function correlates with red blood cell counts in preterm neonates. (**a** and **b**) Red blood cell counts were significantly correlated with uCr/u $\beta$ 2MG at days 14 and 21. (**c** and **d**) Red blood cell counts were correlated with FENa at day 14, but not at day 21. (**e-j**) Red blood cell counts were not correlated with serum creatinine (**e** and **f**), gestational age (**g** and **h**), or birth weight (**i** and **j**). Association between two variables was evaluated by Pearson correlation.  $n = 18$  for day 14 and  $n = 13$  for day 21. uCr/u $\beta$ 2MG, urinary creatinine to beta 2-microglobulin ratio; FENa, fractional excretion of sodium; Cre, creatinine.

## Supplementary figure 5

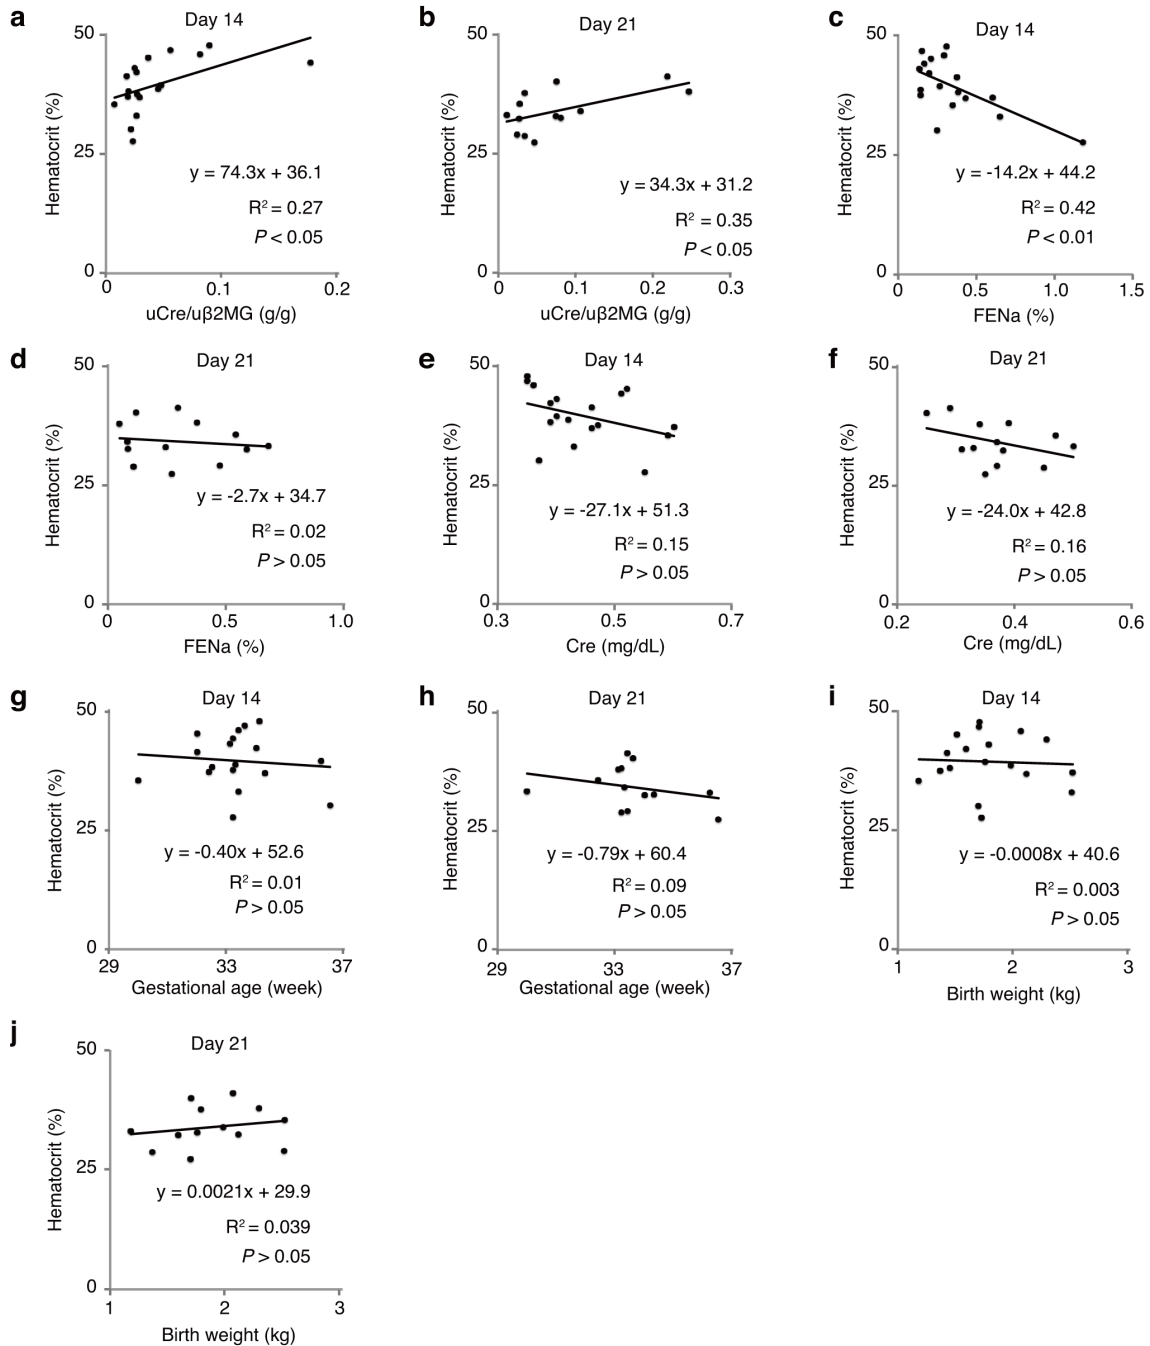

Tubular function correlates with hematocrit levels in preterm neonates. (**a** and **b**) Hematocrit levels were significantly correlated with uCr/uβ2MG at days 14 and 21. (**c** and **d**) Hematocrit levels were correlated with FENa at day 14, but not at day 21. (**e-j**) Hematocrit levels were not correlated with serum creatinine (**e** and **f**), gestational age (**g** and **h**), or birth weight (**i** and **j**). Association between two variables was evaluated by Pearson correlation.  $n = 18$  for day 14 and  $n = 13$  for day 21. uCr/uβ2MG, urinary creatinine to beta 2-microglobulin ratio; FENa, fractional excretion of sodium; Cre, creatinine.
